# Supplementary material for: Inhibitory Effects of Berberine Hydrochloride on Trichophyton mentagrophytes and the Underlying Mechanisms
Source: MDPI journal article supplement (doi:10.3390/molecules24040742), 2019-02-19
Supplement: s1 [file s1]

# Inhibitory Effects of Berberine Hydrochloride on *Trichophyton mentagrophytes* and the Underlying Mechanisms

Chen Wen Xiao, Yan Liu, Qiang Wei, Quan An Ji, Ke Li, Li Jun Pan and Guo Lian Bao \*

Institute of Animal Husbandry and Veterinary Science, Zhejiang Academy of Agricultural Sciences, Hangzhou, Zhejiang 310021, China; xiaochenwen@zaas.ac.cn (C.W.X.); liuyan@zaas.ac.cn (Y.L.); weiqrabbit@163.com (Q.W.); jiquanan@hotmail.com (Q.A.J.); like@zaas.ac.cn (K.L.); p1198600895@126.com (L.J.P.)

\* Correspondence: baoguolian@zaas.ac.cn; Tel.: 86-571-8640-0373

**Table qRT-PCR results correlates with illumina results.**

| DGE            | Clotrimazole | Control      |
|----------------|--------------|--------------|
| TR1318 c0_g1   | 696.99       | 2898.3       |
| TR5979 c1_g1   | 74.308       | 10.622       |
| TR10031 c19_g1 | 498.57       | 82.281       |
| TR12215 c1_g1  | 3.0125       | 17.357       |
| TR3885 c0_g1   | 765.33       | 3204.5       |
| TR905 c0_g1    | 62.708       | 5.0981       |
| RT-PCR         | Clotrimazole | Control      |
| TR1318 c0_g1   | 1.718828     | 7.134151     |
| TR5979 c1_g1   | 664.1336     | 33.08873     |
| TR10031 c19_g1 | 59.2662      | 38.147       |
| TR12215 c1_g1  | 3.414851     | 26.59826     |
| TR3885 c0_g1   | 3.378796     | 17.18032     |
| TR905 c0_g1    | 66.06366     | 5.727624     |
|                |              |              |
| DGE            | Berberine    | Control      |
| TR1318 c0_g1   | 561.32       | 2918.4       |
| TR12215 c1_g1  | 2.3085       | 17.498       |
| TR7831 c2_g1   | 55.859       | 9.4938       |
| TR3885 c0_g1   | 617.28       | 3226.7       |
| RT-PCR         | Berberine    | Control      |
| TR1318 c0_g1   | 1.63346      | 7.13415      |
| TR12215 c1_g1  | 4.54712      | 26.5983      |
| TR7831 c2_g1   | 12.7046      | 2.36789      |
| TR3885 c0_g1   | 3.10613      | 17.1803      |
|                |              |              |
| DGE            | Berberine    | Clotrimazole |
| TR5979 c1_g1   | 7.8593       | 74.925       |
| TR905 c0_g1    | 13.128       | 63.121       |

| <b>RT-PCR</b> | <b>Berberine</b> | <b>Clotrimazole</b> |
|---------------|------------------|---------------------|
| TR5979 c1_g1  | 10.0726          | 664.134             |
| TR905 c0_g1   | 10.956           | 66.0637             |
